# Supplementary material for: Topography evolution of 500 keV Ar4+ ion beam irradiated InP(100) surfaces – formation of self-organized In-rich nano-dots and scaling laws
Source: Royal Society of Chemistry journal article supplement (doi:10.1039/c6cp03409h), 2016-01-01
Supplement: c6cp03409h1.pdf [file c6cp03409h1.pdf]

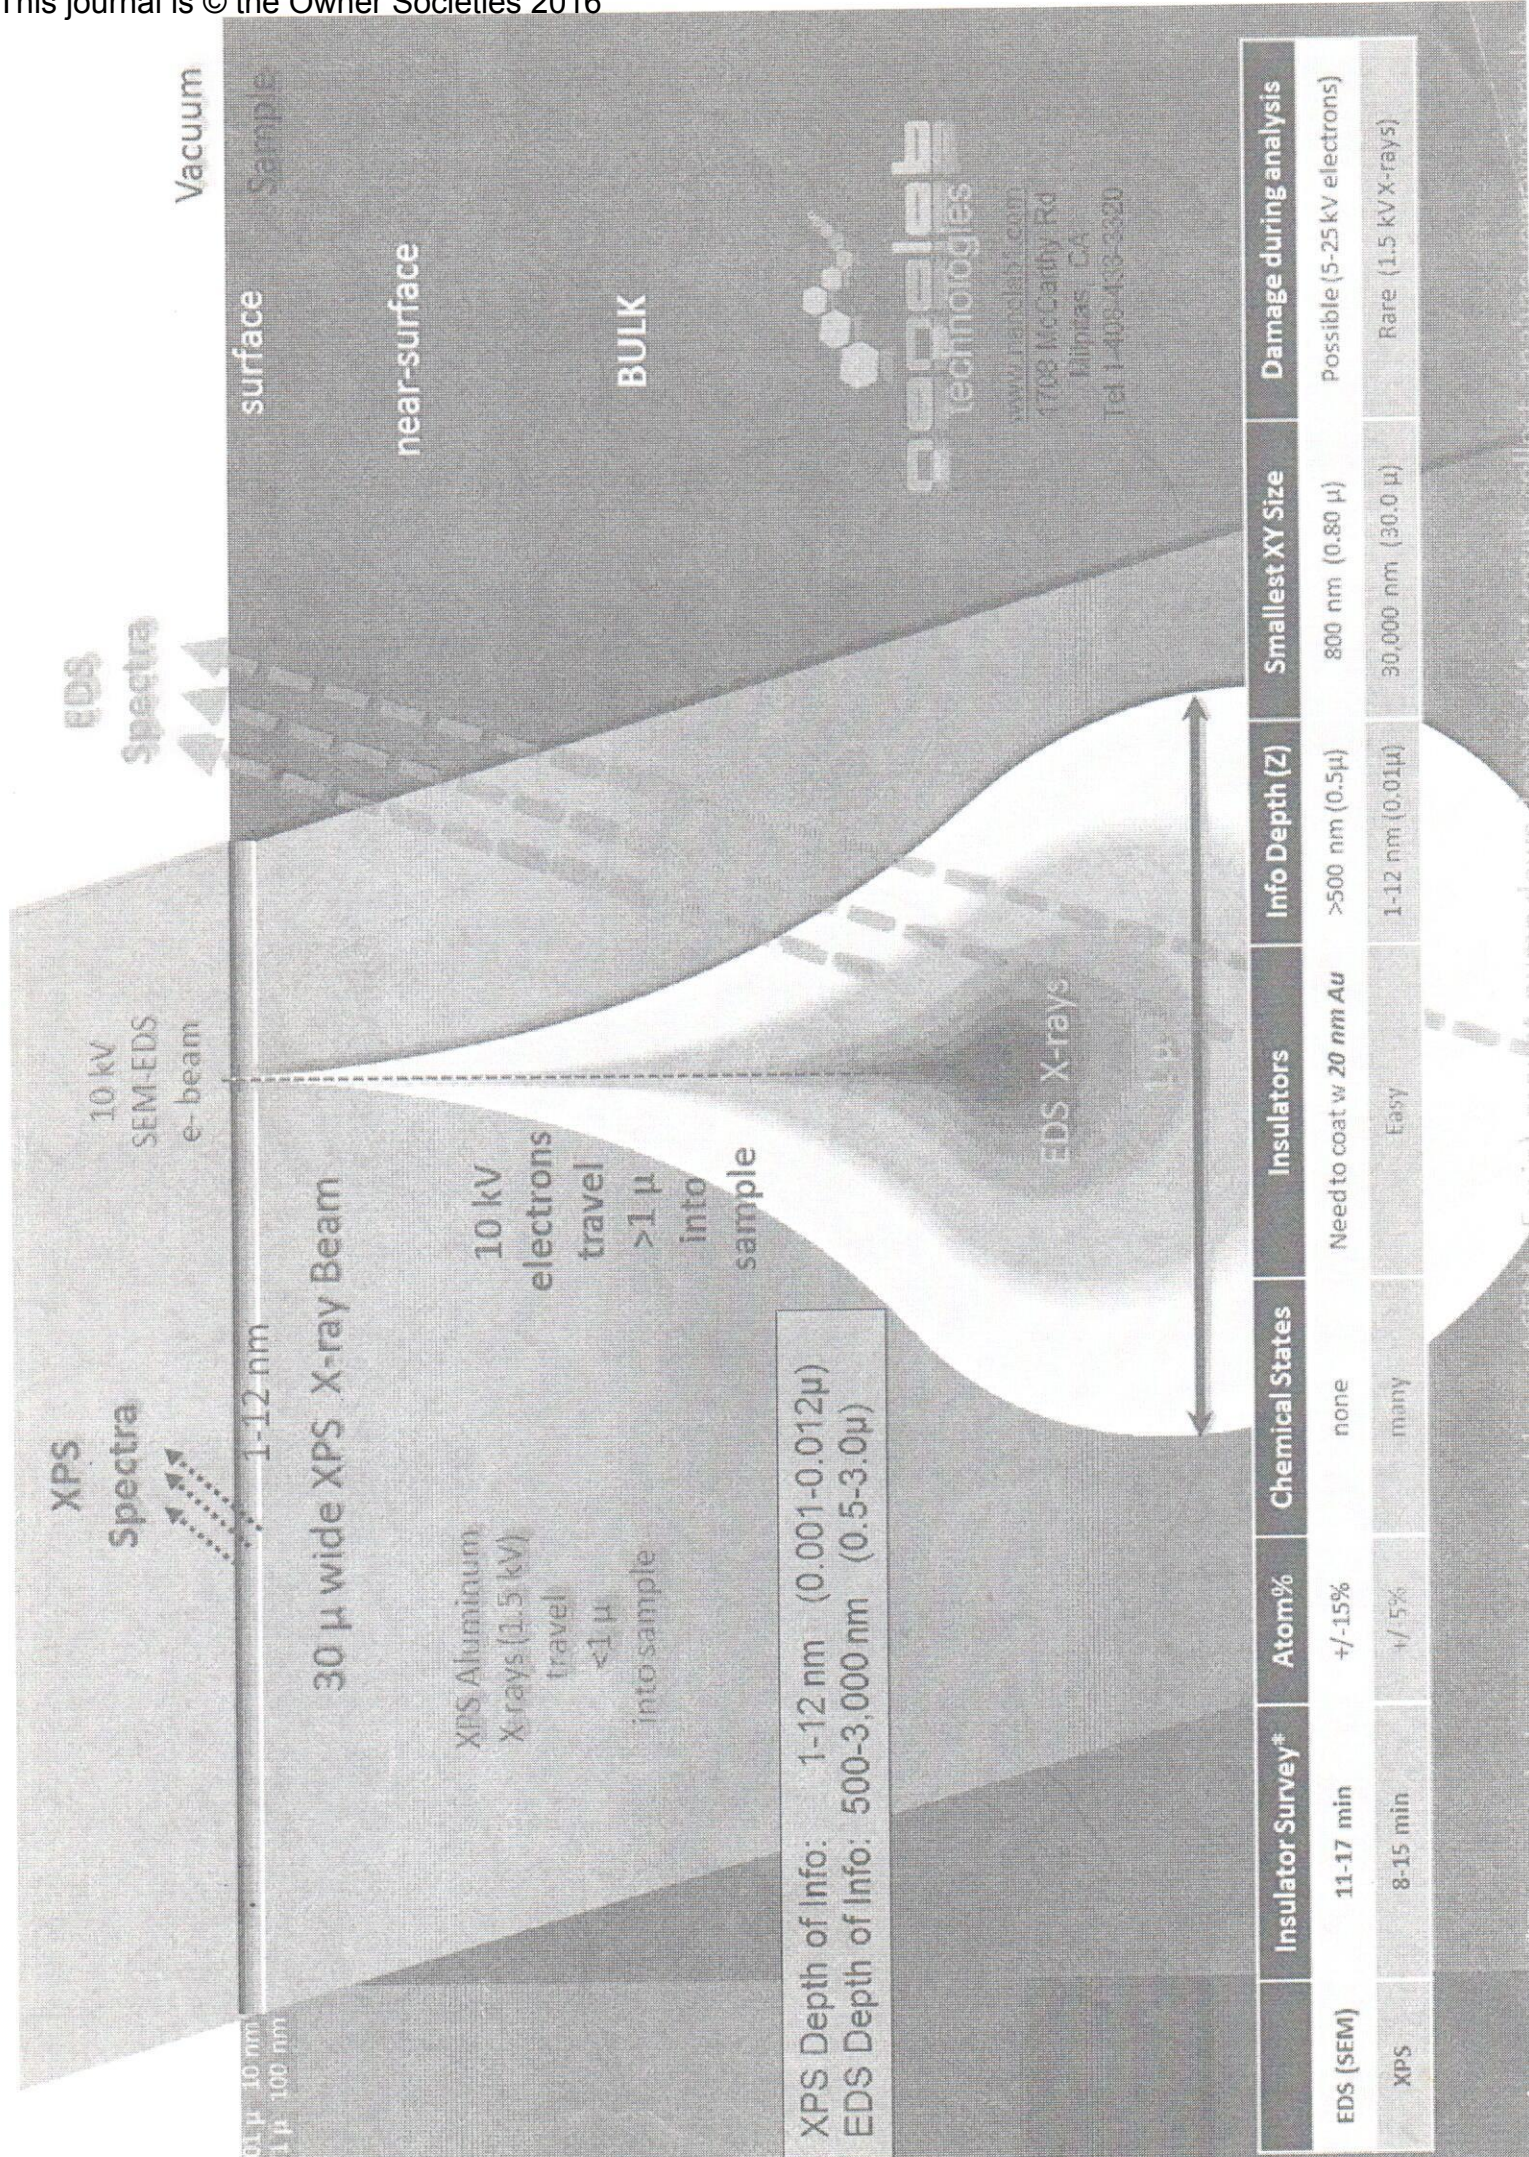

XPS Depth of Info: 1-12 nm (0.001-0.012μ)  
 EDS Depth of Info: 500-3,000 nm (0.5-3.0μ)

|           | Insulator Survey* | Atom%  | Chemical States | Insulators              | Info Depth (Z)  | Smallest XY Size   | Damage during analysis       |
|-----------|-------------------|--------|-----------------|-------------------------|-----------------|--------------------|------------------------------|
| EDS (SEM) | 11-17 min         | +/-15% | none            | Need to coat w 20 nm Au | >500 nm (0.5μ)  | 800 nm (0.80 μ)    | Possible (5-25 kV electrons) |
| XPS       | 8-15 min          | +/-5%  | many            | Easy                    | 1-12 nm (0.01μ) | 30,000 nm (30.0 μ) | Rare (1.5 kV X-rays)         |

\* Insulator Survey (5 min)
